# Supplementary material
Source: PubMed Central journal article supplement (PMC3174312)
Supplement: NIHMS293756-supplement-01.pdf [file NIHMS293756-supplement-01.pdf]

**Supplementary Data****Homozygosity Mapping and Whole Exome Sequencing to Detect *SLC45A2* and *G6PC3* Mutations in a Single Patient with Oculocutaneous Albinism and Neutropenia**

Andrew R. Cullinane, Thierry Vilboux, Kevin O'Brien, James A. Curry, Dawn M. Maynard, Hannah Carlson-Donohoe, Carla Ciccone, NISC Comparative Sequencing Program, Thomas C. Markello, Meral Gunay-Aygun, Marjan Huizing and William A. Gahl

**Supplementary Tables****Supplementary Table 1. White blood cell counts in the patient on and off Neupogen® treatment.**

|                                        | On therapy | 2 days off therapy | Normal Range |
|----------------------------------------|------------|--------------------|--------------|
| Total WBC count (K/ $\mu$ l)           | 5.48       | 1.71               | 3.4-9.6      |
| Absolute neutrophil count (K/ $\mu$ l) | 4.379      | 0.58               | 1.29-7.5     |
| Neutrophil (%)                         | 79.9       | 34                 | 38-78        |
| Absolute lymphocyte count (K/ $\mu$ l) | 0.822      | 0.975              | 0.48-4.9     |
| Absolute monocyte count (K/ $\mu$ l)   | 0.27       | 0.54               | 0.0-1.5      |
| Absolute eosinophil count (K/ $\mu$ l) | 0.00       | 0.00               | 0.-0.77      |
| Absolute basophil count (K/ $\mu$ l)   | 0.0        | 0.00               | 0..29        |

\* WBC – White Blood Cell

\*\* K/ $\mu$ l – Thousands of cells per microliter

**Supplementary Table 2. Whole blood and immunological analysis**

|                             | Patient Values | Normal Range |
|-----------------------------|----------------|--------------|
| ALT (U/L)                   | 19             | 6-41         |
| Complement C3 (mg/dL)       | 154            | 69-175       |
| Complement C4 (mg/dL)       | 24             | 13-38        |
| Hematocrit (%)              | 36             | 31.8-43.2    |
| Hemoglobin (mg/dL)          | 12.9           | 11.1-15.0    |
| IgG subclasses 1-4          | normal         | -            |
| Lymphocyte B-cell defects   | normal         | -            |
| Lymphocyte phenotyping TBNK | normal         | -            |
| Platelets (K/uL)            | 21             | 162-380      |
| Prothrombin time (s)        | 13.3           | 11.8-14.7    |
| Reticulocyte (%)            | 1.49           | 0.66-2.47    |
| Reticulocyte count (K/uL)   | 60.0           | 31.7-104.6   |
| Serum creatinine (mg/dL)    | 0.8            | 0.7-1.3      |
| Serum sodium (mmol/L)       | 139            | 135-144      |
| Total bilirubin (mg/dL)     | 0.6            | 0.1-1.0      |
| Total IgA (mg/dL)           | 88             | 91-499       |
| Total IgG (mg/dL)           | 1170           | 642-1730     |
| Total IgM (mg/dL)           | 104            | 34-342       |

\* K/ $\mu$ l – Thousands of cells per microliter

**Supplementary Table 3. Filtered gene variants within known homozygous regions of the patient.**

| Chromosome | Genome Position |          | Gene    | Mutation Type     | Reference | Allele  |           | Patient | Amino Acid |          |     | CDPred Score |
|------------|-----------------|----------|---------|-------------------|-----------|---------|-----------|---------|------------|----------|-----|--------------|
|            | Left            | Right    |         |                   |           | Variant | Reference |         | Variant    | Position |     |              |
| 5          | 33990267        | 33990269 | SLC45A2 | Frameshift (Stop) | A         | -       | --        | A       | PfsX68     | 330      | -30 |              |
| 17         | 39508724        | 39508726 | G6PC3   | Stop              | C         | T       | TT        | Q       | X          | 152      | -30 |              |
| 17         | 42590581        | 42590583 | CDC27   | Stop              | A         | C       | CC        | L       | X          | 155      | -30 |              |
| 5          | 35945878        | 35945880 | CAPSL   | Non-synonymous    | T         | C       | CC        | D       | G          | 124      | -11 |              |
| 19         | 10684849        | 10684851 | QTRT1   | Non-synonymous    | C         | G       | CC        | F       | L          | 372      | -9  |              |
| 17         | 42569603        | 42569605 | CDC27   | Non-synonymous    | T         | C       | CC        | H       | R          | 608      | -8  |              |
| 4          | 42287615        | 42287617 | ATP8A1  | Non-synonymous    | G         | A       | AA        | L       | F          | 165      | -6  |              |
| 17         | 42569598        | 42569600 | CDC27   | Non-synonymous    | A         | G       | GG        | F       | L          | 610      | -5  |              |
| 17         | 42574281        | 42574283 | CDC27   | Non-synonymous    | T         | C       | CC        | Y       | C          | 495      | -4  |              |
| 17         | 42569590        | 42569592 | CDC27   | Non-synonymous    | T         | G       | GG        | L       | F          | 612      | -3  |              |
| 17         | 42574327        | 42574329 | CDC27   | Non-synonymous    | A         | C       | CC        | C       | G          | 480      | -3  |              |
| 17         | 42590633        | 42590635 | CDC27   | Non-synonymous    | A         | C       | CC        | Y       | D          | 138      | -3  |              |
| 19         | 11839827        | 11839829 | ZNF439  | Non-synonymous    | G         | T       | TT        | R       | I          | 315      | -3  |              |
| 19         | 12724428        | 12724430 | BEST2   | Non-synonymous    | G         | A       | AA        | R       | Q          | 8        | -2  |              |
| 17         | 42571160        | 42571162 | CDC27   | Non-synonymous    | A         | C       | CC        | D       | E          | 548      | -1  |              |
| 17         | 42574311        | 42574313 | CDC27   | Non-synonymous    | T         | C       | CC        | N       | S          | 485      | -1  |              |
| 17         | 42587149        | 42587151 | CDC27   | Non-synonymous    | A         | C       | CC        | F       | V          | 282      | -1  |              |
| 17         | 42590596        | 42590598 | CDC27   | Non-synonymous    | G         | C       | CC        | S       | C          | 150      | -1  |              |
| 17         | 42571167        | 42571169 | CDC27   | Non-synonymous    | T         | G       | GG        | Q       | P          | 546      | -1  |              |
| 17         | 42590651        | 42590653 | CDC27   | Non-synonymous    | C         | T       | TT        | A       | T          | 132      | 0   |              |
| 17         | 42571170        | 42571172 | CDC27   | Non-synonymous    | A         | G       | GG        | L       | P          | 545      | 1   |              |
| 17         | 42576284        | 42576286 | CDC27   | Non-synonymous    | C         | T       | TT        | S       | N          | 378      | 1   |              |
| 17         | 42576316        | 42576318 | CDC27   | Non-synonymous    | A         | C       | CC        | I       | M          | 367      | 1   |              |
| 17         | 45807774        | 45807776 | EME1    | Non-synonymous    | A         | C       | CC        | E       | D          | 69       | 2   |              |
| 19         | 9952350         | 9952352  | COL5A3  | Non-synonymous    | A         | T       | TT        | D       | E          | 859      | 2   |              |
| 4          | 52637817        | 52637819 | SPATA18 | Non-synonymous    | A         | G       | GG        | K       | R          | 292      | 2   |              |
| 4          | 74672483        | 74672485 | RASSF6  | Non-synonymous    | A         | G       | GG        | Y       | H          | 107      | 2   |              |
| 17         | 42574294        | 42574296 | CDC27   | Non-synonymous    | G         | C       | CC        | P       | A          | 491      | 3   |              |
| 4          | 70190004        | 70190006 | UGT2B28 | Non-synonymous    | G         | A       | AA        | A       | T          | 346      | 3   |              |

### **Supplementary Table 3 Legend**

The whole-exome data were aligned to USCS human genome build 18, and filtered for known SNPs. Data are sorted by the potential detriment (CD\_Pred) score. Note the two mutations in *SLC45A2* (c.987delA, p.A330PfsX68) and *G6PC3* (c.829C>T, p.Q277X).

### **Supplementary Figure Legends**

#### **Supplementary Figure 1. Homozygous regions in the patient**

- a) SNP data for the patient showing the regions of extended homozygosity (red boxes) on several chromosomes. Normal regions of no-called SNPs are outlined on chromosome 1 and 9 with a green box. The middle of the B allele plots represents heterozygosity (AB) and the upper and lower edges represent homozygosity (AA or BB).
- b) Table showing actual start and end positions of extended regions of homozygosity. The base positions were determined from USCS genome build 18.

#### **Supplementary Figure 2. Coomassie and silver stained gels**

- a) Coomassie stained polyacrylamide gel of conditioned medium and lysates from control and patient cells. The same pattern and intensity of bands can be seen for both control and patient lanes.
- b) Silver stained gel from a, showing same pattern and intensity of bands for both control and patient's condition media.
